# Supplementary material for: Catalyst-free amino-alcoholysis depolymerization strategy: a facile and powerful tool for chemical recycling of poly(bisphenol A carbonate)
Source: Royal Society of Chemistry journal article supplement (doi:10.1039/d2gc03568e), 2023-01-01
Supplement: d2gc03568e1.pdf [file d2gc03568e1.pdf]

## Supporting Information

### **Catalyst-free amino-alcoholysis depolymerization strategy: a facile and powerful tool for chemical recycling of poly(bisphenol A carbonate)**

Xianyue Zhou,<sup>‡,a</sup> Maoqing Chai,<sup>‡,a</sup> Guangqiang Xu,<sup>\*,b,c</sup> Rulin Yang,<sup>b,c</sup> Hongguang  
Sun,<sup>\*,a</sup> and Qinggang Wang<sup>\*,b,c</sup>

## Experimental section

### Materials

The BPA-PC (pellet, bowl, goggle, frame, disc, lampshade, bucket, veil, tube), PLA (cup), PBS (straw), PET (bottle) materials were purchased on Taobao.com and amazon.cn and used without further purification. Ethanolamine (> 99%, Aladdin), (*R*)-2-amino-1-propanol (97%, Macklin), D-phenylalaninol (98%, Macklin), (*R*)-2-amino-3,3-dimethyl-1-butanol (> 99%, Macklin), (1*S*,2*S*)-2-aminocyclohexanol (98%, Bidepharm), 2-methylaminoethanol (> 99%, TCI), as commercial grade depolymerizing reagents were used without further purification. Dibromomethane (98%, Energy Chemical) and hexamethylbenzene (98%, Energy Chemical) were used as internal standard. Toluene (> 99%), dichloromethane (> 99%), ethyl acetate (> 99%), tetrahydrofuran (> 99%), N,N-dimethylformamide (> 99%) and dimethyl sulfoxide (> 99%) were purchased as solvents at Sinopharm Chemical Reagent Co., Ltd. 2-Methyltetrahydrofuran (> 99%) was purchased as a solvent at Macklin. Chloroform-*d* (> 99%) was purchased at Cambridge Isotope laboratories, Inc. Dimethyl sulfoxide-*d*<sub>6</sub> (> 99%) was purchased at Energy Chemical. Chromatographic tetrahydrofuran (THF) was purchased from Honeywell LTD for the analysis of GPC measurements.

### Instrumentation

Nuclear magnetic resonance measurements were performed at room temperature on Bruker Advance instrument at 400 MHz (<sup>1</sup>H NMR), 100 MHz (<sup>13</sup>C NMR), using CDCl<sub>3</sub> and Dimethyl sulfoxide-*d*<sub>6</sub> as solvent and TMS as internal reference. Molecular weight ( $M_n$ ) and dispersity ( $\mathbb{D}$ ) of the polymers were determined by gel permeation chromatography (GPC, Agilent 1260 LC, USA) using THF as the eluent (flow rate: 1 mL/min, at 40°C). DSC measurements were performed on a TA Instrument Q100 DSC equipped with a refrigerated cooling system (RCS) under a N<sub>2</sub> atmosphere. The instrument was operated in the standard DSC mode and was calibrated with an indium standard. Samples (about 5 mg) were heated from 25°C to 250°C at 10°C/min, hold for 10 minute and then cooled to 0 °C at 10°C/min, the data were then collected in the second heating ramp from 0°C to 250°C at 10°C/min. Glass transition temperatures ( $T_g$ ) were read as the middle of the change in heat capacity. The



analysis. After 2 h, we calculated that the conversion was 100%. Then, DMSO was recovered by vacuum distillation (70°C, 0.23 mbar) with a recovery rate of 93%. The NMR spectra showed that the recovered DMSO was pure without impurities. After that, a certain amount of water was introduced to the remaining solids, stirring uniformly. The suspension was filtered to collect the precipitate and filtrate. The precipitate was vacuum dried, 88 g of BPA with a yield of 96% was obtained. After evaporative concentration and ether washing of filtrate, 28 g of 2-oxazolidone was obtained in 83% yield.

2-Oxazolidone :  $^1\text{H}$  NMR (400 MHz,  $\text{DMSO-}d_6$ )  $\delta$  7.46 (s, 1H), 4.32-4.25 (m, 2H), 3.42-3.46 (m, 2H).  $^{13}\text{C}$  NMR (100 MHz,  $\text{DMSO-}d_6$ )  $\delta$  155.4, 141.5, 127.8, 115.0, 41.4, 31.4.

BPA :  $^1\text{H}$  NMR (400 MHz,  $\text{DMSO-}d_6$ )  $\delta$  9.12 (s, 2H), 7.00-6.94 (m, 4H), 6.68-6.59 (m, 4H), 1.52 (s, 6H).  $^{13}\text{C}$  NMR (100 MHz,  $\text{DMSO-}d_6$ )  $\delta$  160.1, 64.6, 40.4.

#### General procedure for gram-scale depolymerization under solvent-free condition (Fig. 4)

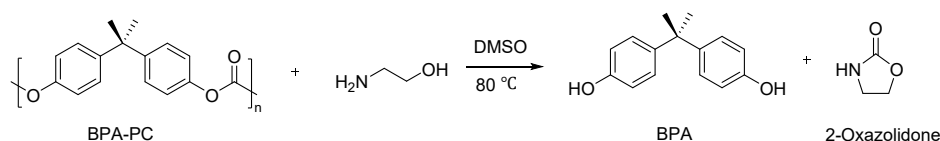

The depolymerization of 30 g BPA-PC tubes was carried out in a round-bottomed flask at 120°C. BPA-PC tubes (30 g, 1 equiv.) were added first. Ethanolamine (7.6 mL, 1.06 equiv.) was then added. The reaction was monitored by  $^1\text{H}$  NMR spectrum, aliquot was taken for  $^1\text{H}$  NMR spectroscopic analysis. After 47 h, we calculated that the conversion was 100%. The reaction system was cooled to room temperature. After that, a certain amount of water was introduced to the reaction, stirring uniformly. The suspension was filtered to collect the precipitate and filtrate. The precipitate was vacuum dried, 26.5 g of BPA with a yield of 98% was obtained. After evaporative concentration and column chromatography (chloroform as eluent), 7.3 g of 2-oxazolidone was obtained in 71% yield.

#### General procedure for the synthesis of BPA-PC (Fig. 5)

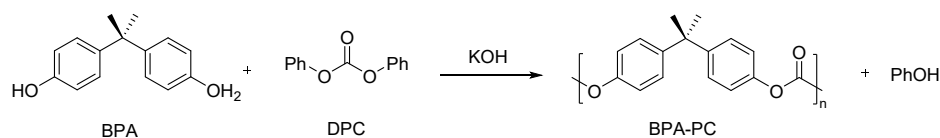

To a round-bottom flask, 8.1 g bisphenol A (35.6 mmol, 1 equiv.) and 8.4 g diphenyl carbonate (39.2 mmol, 1.1 equiv.) were weighed and added, followed by 0.2 mg potassium hydroxide (0.003 mmol, 0.01 mol%). The air was removed from the system by a vacuum pump. The reaction was divided into two stages. The transesterification reaction stage was carried out under the protection of argon. The reaction was stirred slowly at 130°C for 30 minutes, and then heated to 170°C for 120 minutes. In the polycondensation reaction stage, the temperature was rapidly increased to 220°C, and the reaction was slowly reduced to 70 mbar for 30 minutes. Then continue to reduce the pressure to 0.001 mbar, and increase the temperature to 260°C. Continue to react for 30 minutes and then stop heating, keep the pressure naturally cooling to room temperature, and finally get colorless and transparent solid.

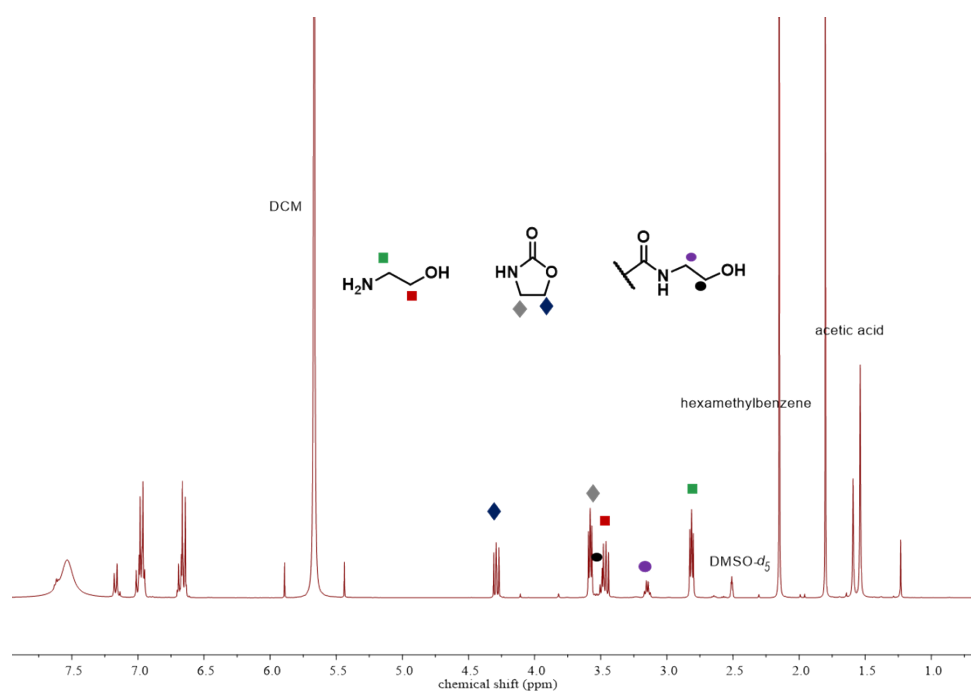

**Figure S1.**  $^1\text{H}$  NMR spectrum of the degradation product in DCM. (400 MHz,  $\text{DMSO-}d_6$ , 298 K).

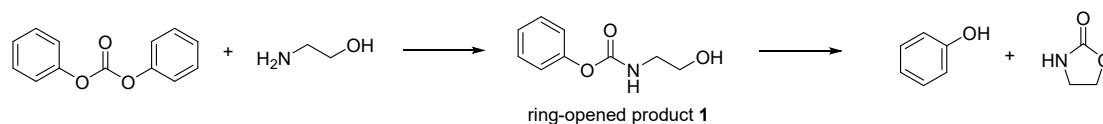

**Tables S1.** Results of the reaction of diphenyl carbonate with 1 equiv. of ethanolamine in DMSO.

| Time   |  |  |  |
|--------|-------------------------------------------------------------------------------------|--------------------------------------------------------------------------------------|---------------------------------------------------------------------------------------|
| 30 min | 78.7%                                                                               | 21.3%                                                                                | 0%                                                                                    |
| 1 h    | 88.5%                                                                               | 11.5%                                                                                | 0%                                                                                    |
| 6 h    | 100%                                                                                | 0%                                                                                   | 0%                                                                                    |

Reaction conditions: diphenyl carbonate (2 mmol), ethanolamine (2 mmol),  $V_{\text{solvent}} = 1 \text{ mL}$ ,  $50 \text{ }^\circ\text{C}$ .

**Tables S2.** Results of the reaction of diphenyl carbonate with 1 equiv. of ethanolamine in chloroform.

| Time   |  |  |  |
|--------|-----------------------------------------------------------------------------------|------------------------------------------------------------------------------------|-------------------------------------------------------------------------------------|
| 30 min | 0%                                                                                | 87.8%                                                                              | 12.2%                                                                               |
| 1 h    | 0%                                                                                | 91.7%                                                                              | 8.3%                                                                                |
| 6 h    | 1.1%                                                                              | 97.0%                                                                              | 1.9%                                                                                |

Reaction conditions: diphenyl carbonate (2 mmol), ethanolamine (2 mmol),  $V_{\text{solvent}} = 1 \text{ mL}$ ,  $50 \text{ }^\circ\text{C}$ .

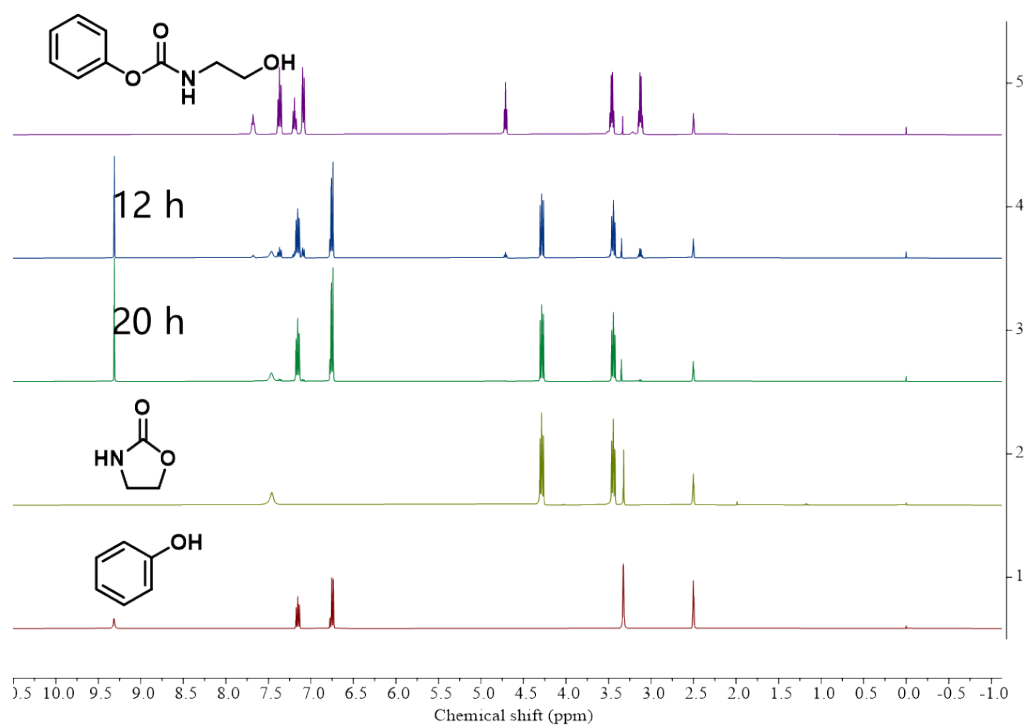

**Figure S2.**  $^1\text{H}$  NMR spectra changes of ring-opened product **1** in  $\text{DMSO-}d_6$ .

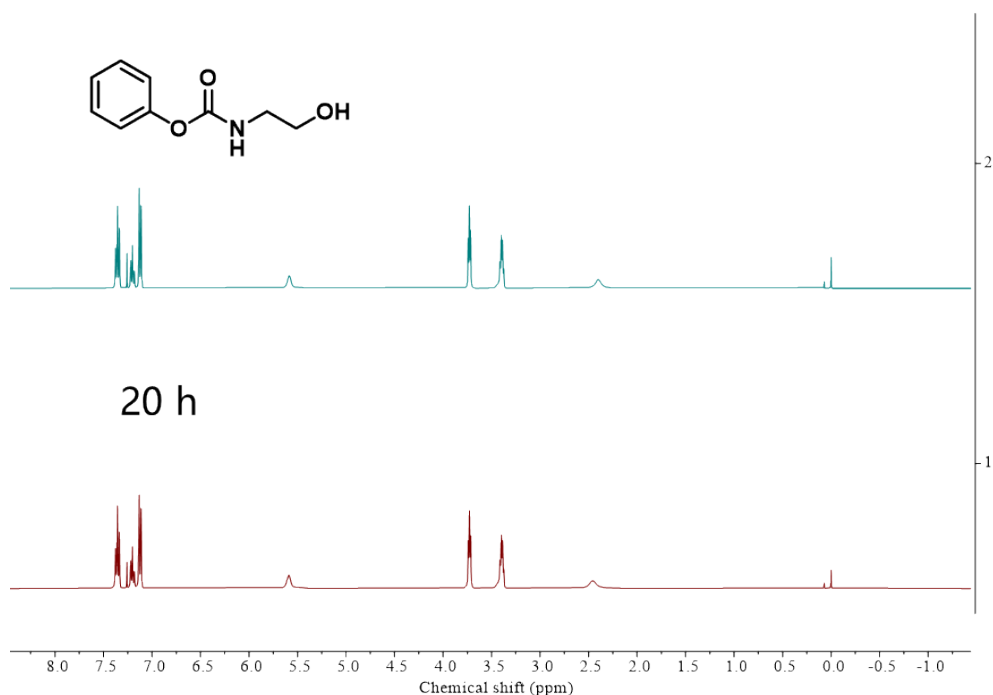

**Figure S3.**  $^1\text{H}$  NMR spectra changes of ring-opened product **1** in  $\text{CDCl}_3$ .

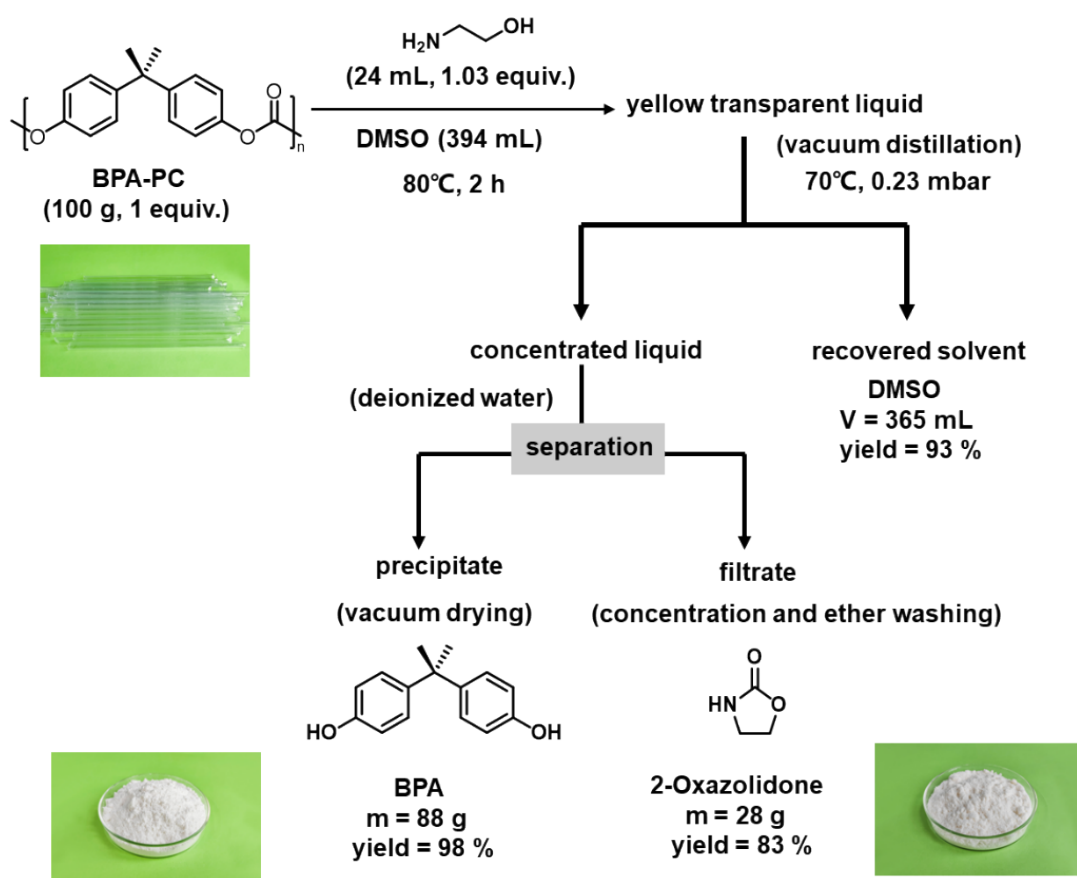

**Figure S4.** The gram-scale depolymerization of BPA-PC tube by using ethanolamine in DMSO.



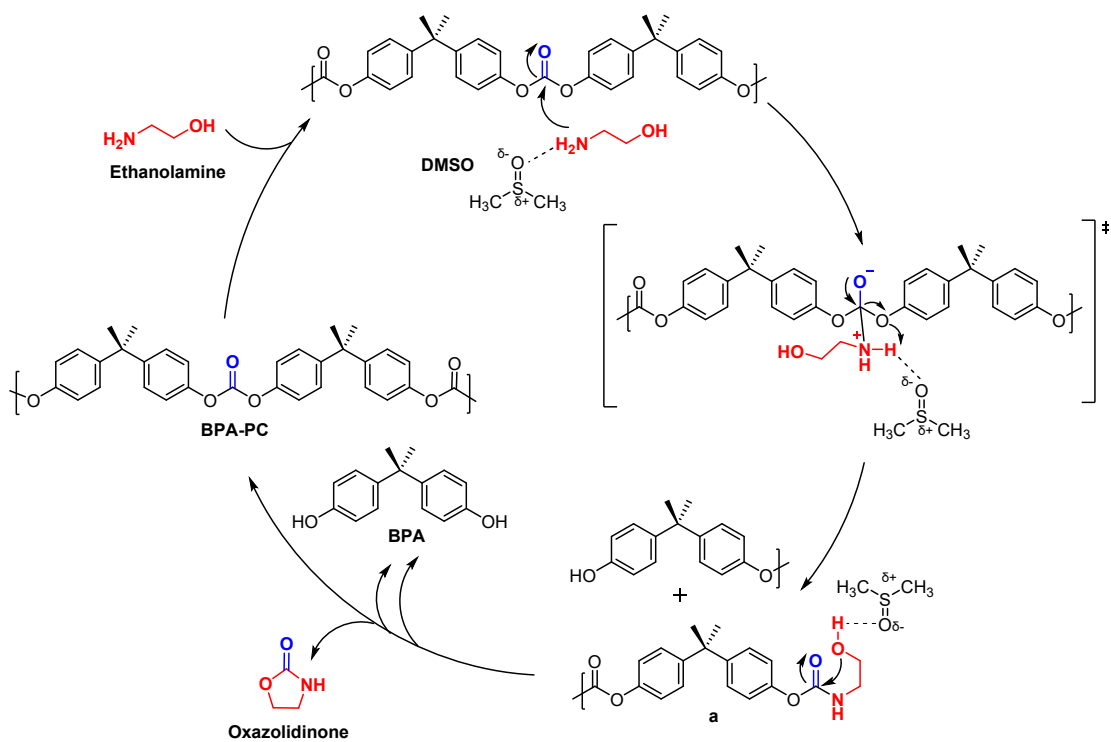

**Figure S5.** Proposed mechanism.

**Table S3.** Results of PC materials depolymerization with ethanolamine.

| Entry <sup>a</sup> | Material                                                                            | Name      | Time (h) | Conv. <sup>b</sup> (%) | BPA <sup>b</sup> (%) | 2-Oxazolidone <sup>b</sup> (%) |
|--------------------|-------------------------------------------------------------------------------------|-----------|----------|------------------------|----------------------|--------------------------------|
| 1                  |  | bowl      | 2        | 99                     | 99                   | 99                             |
| 2                  |  | goggle    | 2        | 99                     | 99                   | 99                             |
| 3                  |  | frame     | 2        | 99                     | 97                   | 97                             |
| 4                  |  | disc      | 2        | 99                     | 94                   | 93                             |
| 5                  |  | lampshade | 2        | 99                     | 99                   | 99                             |
| 6                  |  | bucket    | 3        | 99                     | 98                   | 99                             |

|   |                                                                                   |      |   |    |    |    |
|---|-----------------------------------------------------------------------------------|------|---|----|----|----|
| 7 |  | veil | 2 | 99 | 99 | 99 |
| 8 |  | tube | 3 | 99 | 99 | 99 |

a. The degradation of BPA-PC commodities. Depolymerization conditions: BPA-PC commodities (254 mg, 1 mmol based on BPA unit), ethanolamine (61  $\mu\text{L}$ , 1 mmol) in DMSO (1 mL) at 50°C. b. Determined by  $^1\text{H}$  NMR spectroscopy in DMSO- $d_6$  using dibromomethane (145  $\mu\text{L}$ , 2 mmol) as an internal standard, acetic acid as quencher.

**Table S4.** The hardness of BPA-PC materials.

| Sample      | bowl | goggle | frame | disc | lampshade | bucket | veil | tube |
|-------------|------|--------|-------|------|-----------|--------|------|------|
| Hardness/HD | 79   | 68     | 82    | 84   | 79        | 62     | 74   | 67   |

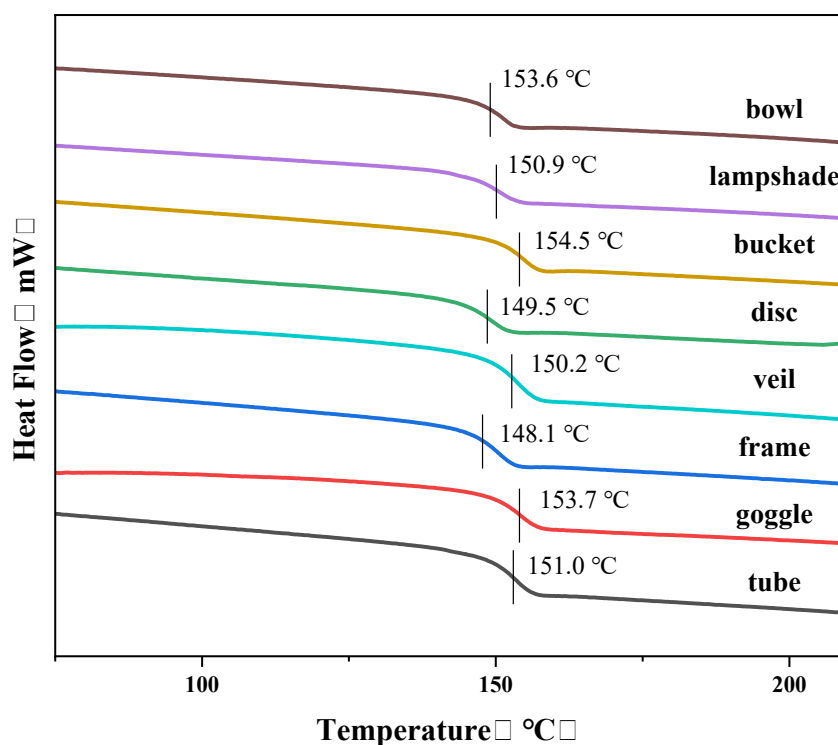

**Figure S6.** DSC analysis of glass transition temperature of bowl, lampshade, bucket, disc, veil, frame, goggle and tube.

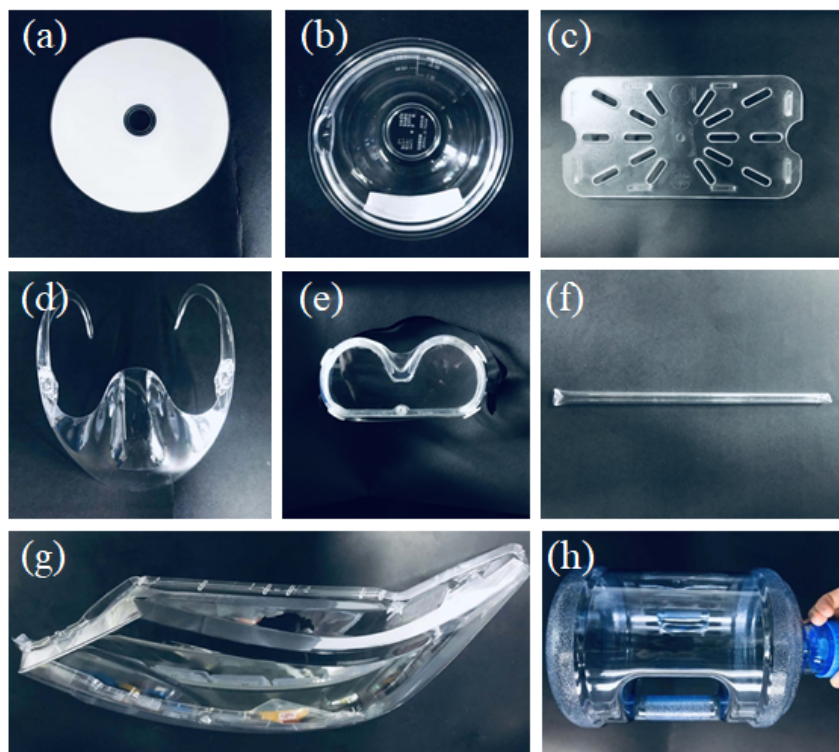

**Figure S7.** BPA-PC samples: (a) disc, (b) bowl, (c) fixed frame, (d) veil, (e) goggle, (f) tube, (g) lampshade, (h) bucket.

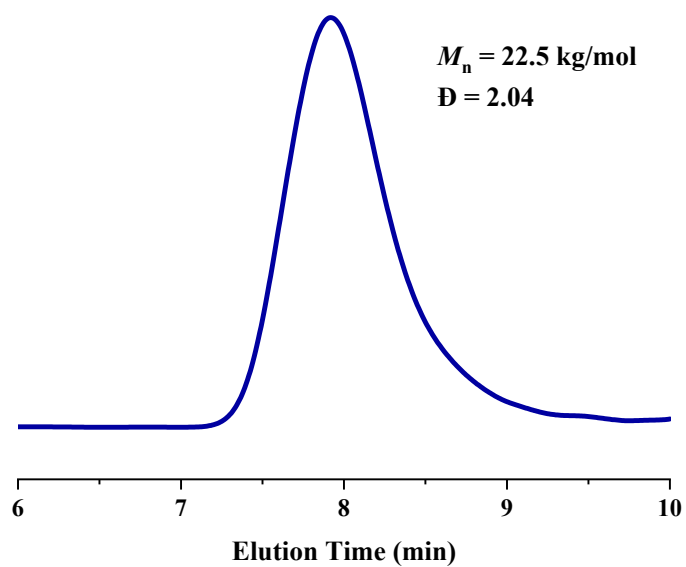

**Figure S8.** GPC analysis for BPA-PC disc.

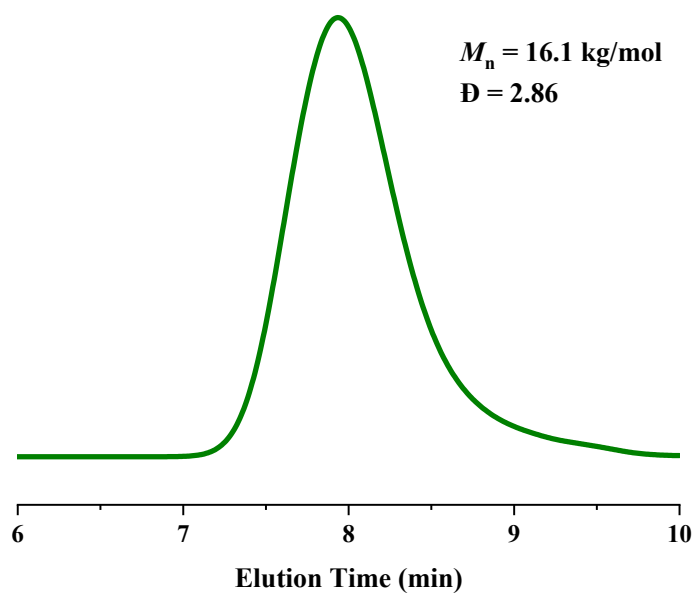

**Figure S9.** GPC analysis for BPA-PC bowl.

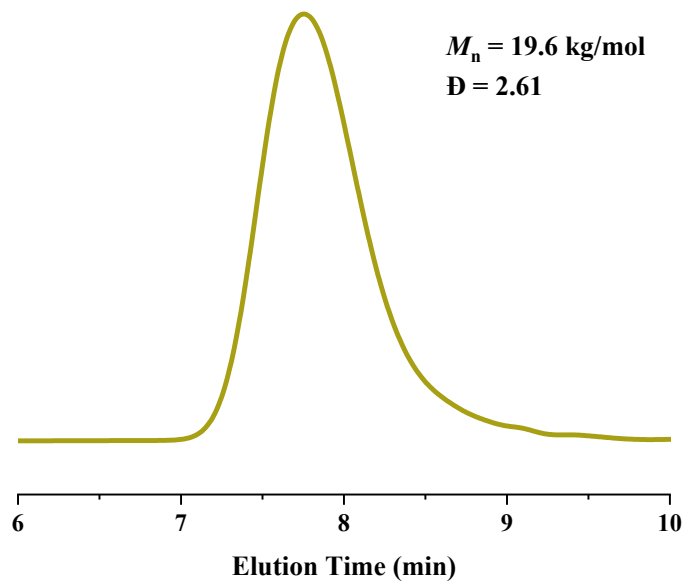

**Figure S10.** GPC analysis for BPA-PC fixed frame.

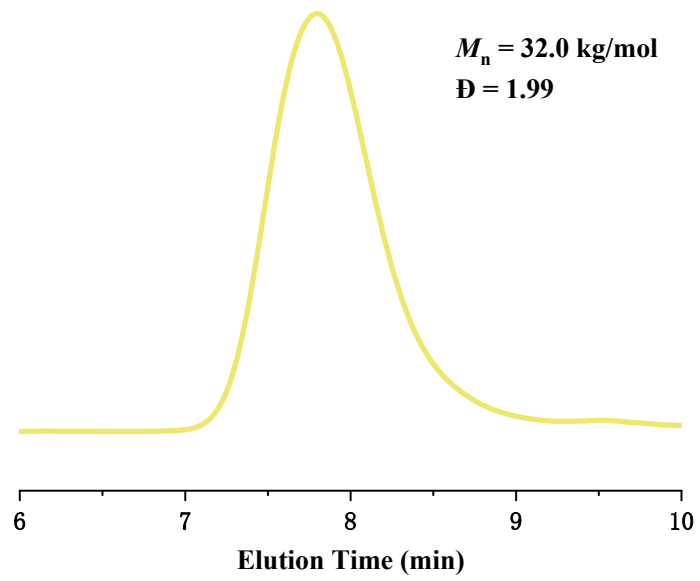

**Figure S11.** GPC analysis for BPA-PC veil.

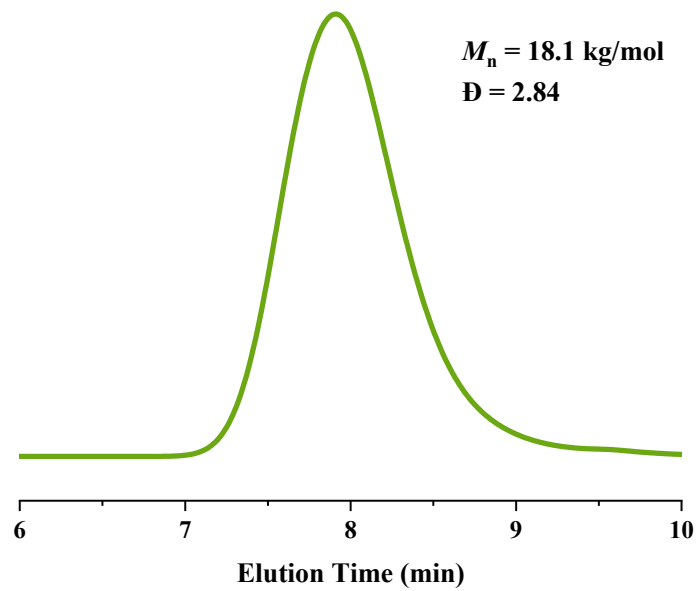

**Figure S12.** GPC analysis for BPA-PC goggle.

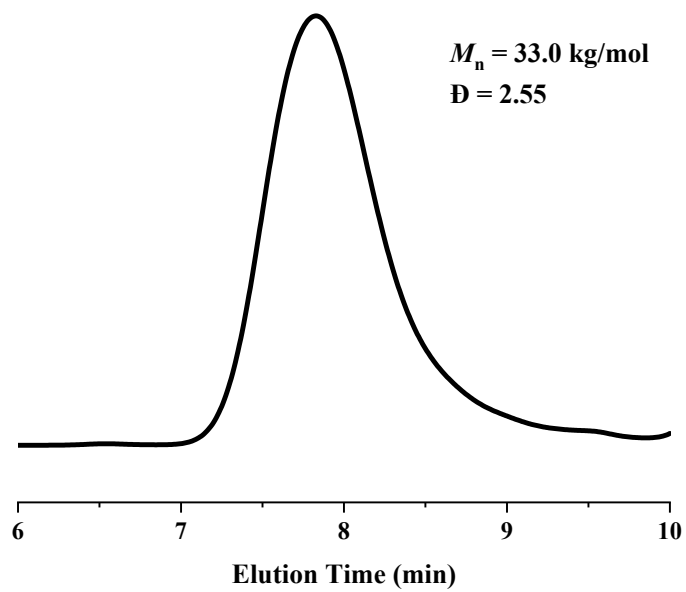

**Figure S13.** GPC analysis for BPA-PC tube.

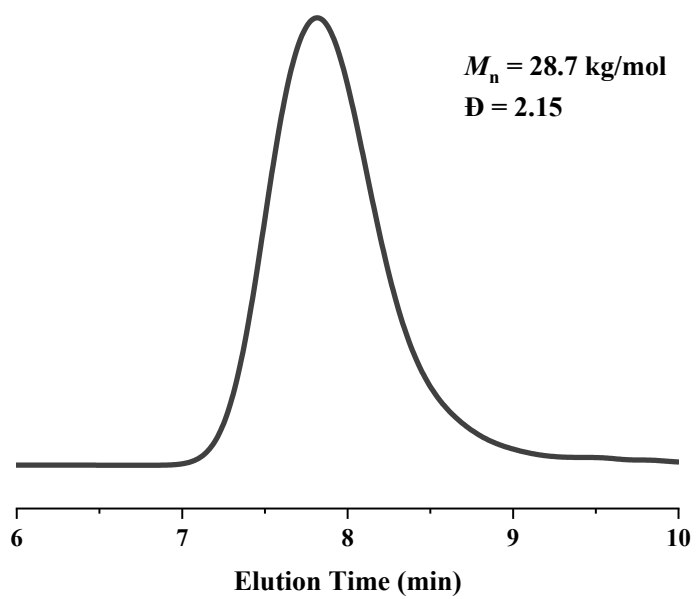

**Figure S14.** GPC analysis for BPA-PC lampshade.

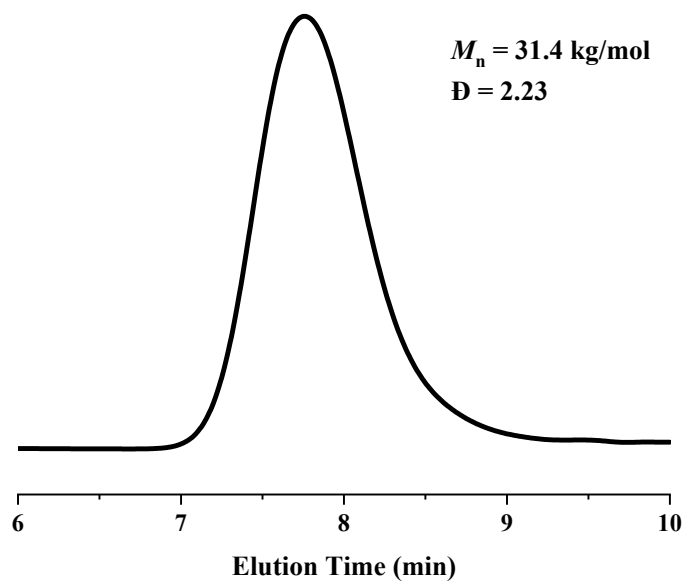

**Figure S15.** GPC analysis for BPA-PC bucket.

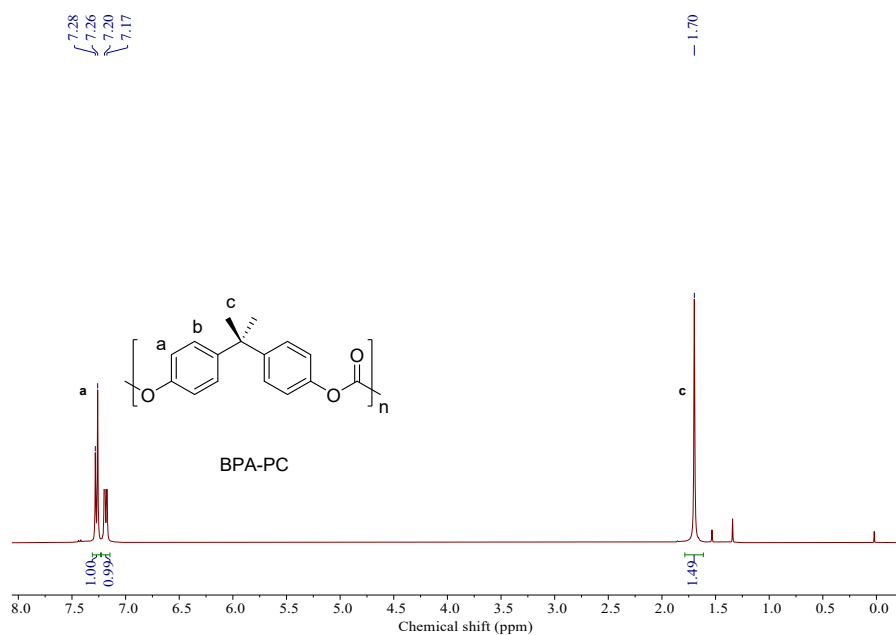

**Figure S16.**  $^1\text{H}$  NMR spectrum of BPA-PC (400 MHz, Chloroform- $d$ , 298 K).

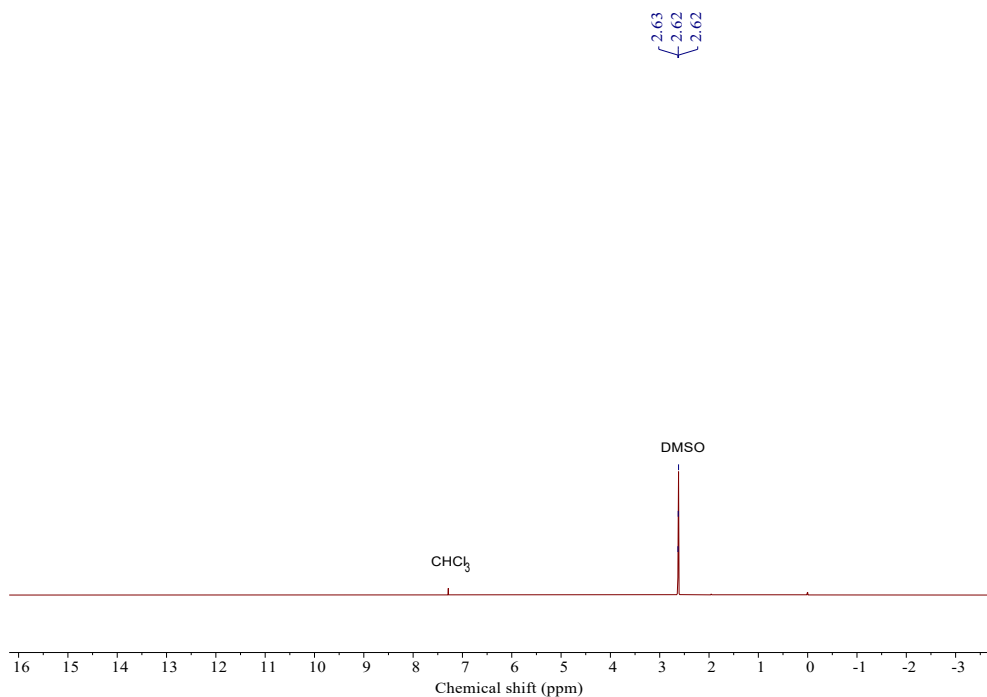

**Figure S17.**  $^1\text{H}$  NMR spectrum of recovered DMSO (400 MHz, Chloroform-*d*, 298 K).

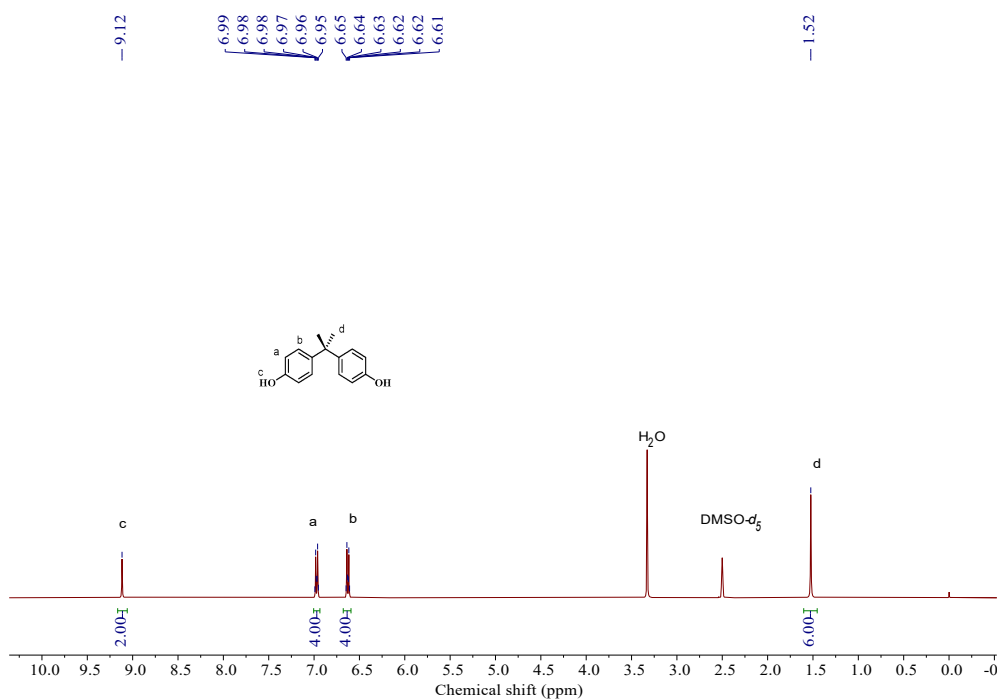

**Figure S18.**  $^1\text{H}$  NMR spectrum of recovered BPA (400 MHz, DMSO-*d*<sub>6</sub>, 298 K).



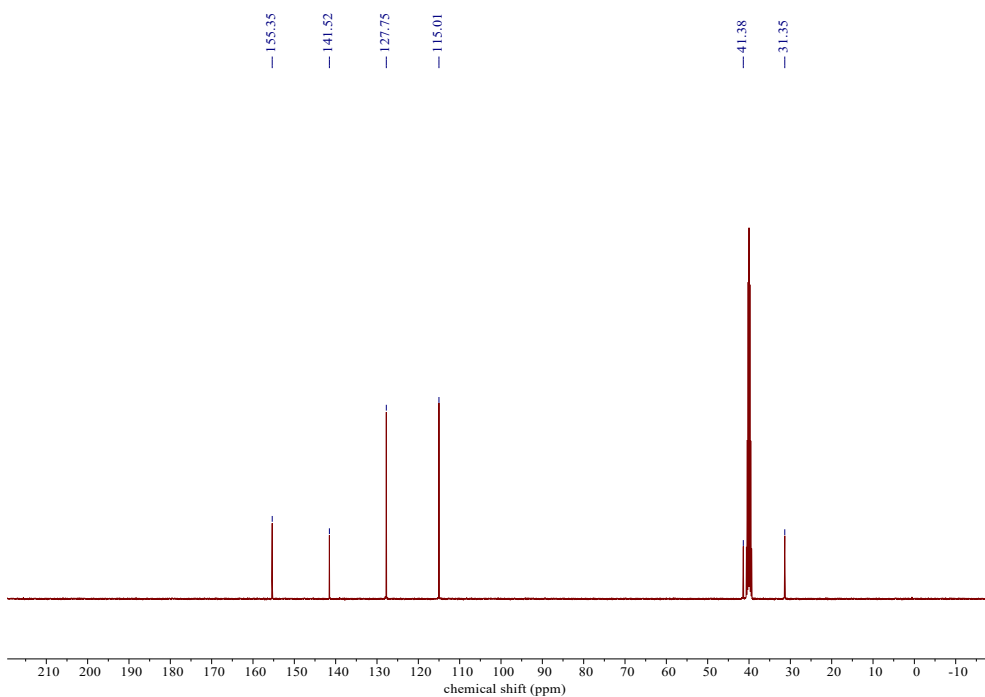

**Figure S19.**  $^{13}\text{C}$  NMR spectrum of recovered BPA (400 MHz,  $\text{DMSO-}d_6$ , 298 K).

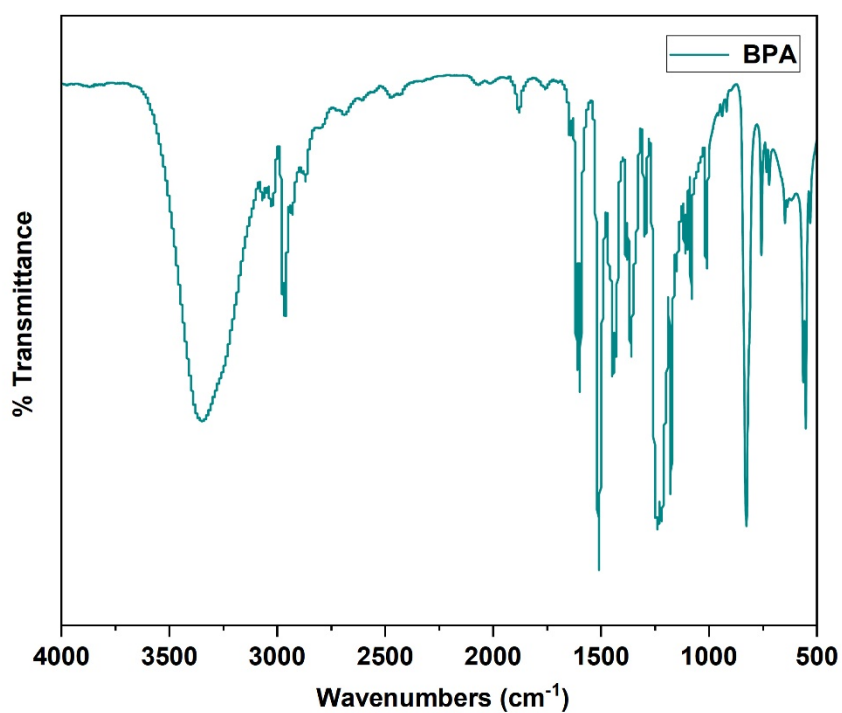

**Figure S20.** IR spectrum of recovered BPA.

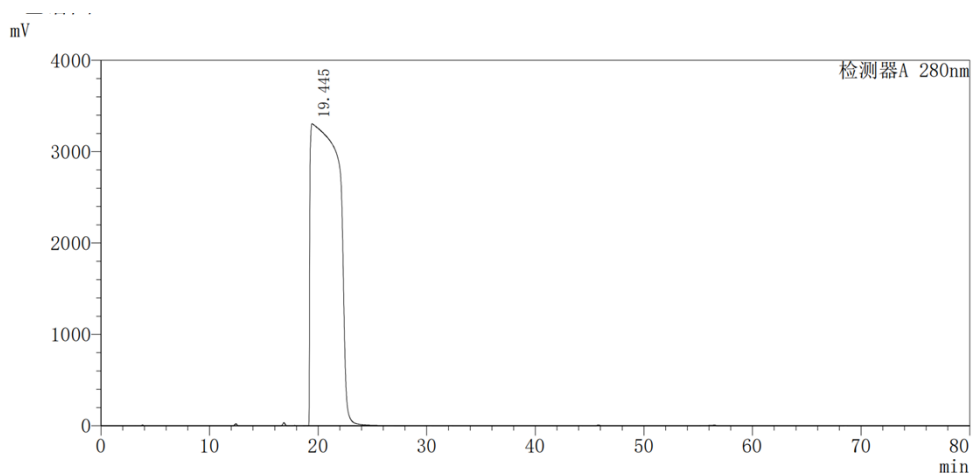

Methods: column, C18; flow rate, 1 mL/min;  
 eluent, 0-30 min: (0.1%) phosphoric acid/acetonitrile/methanol = 65/25/10; 30-50 min:  
 (0.1%) phosphoric acid/acetonitrile/methanol = 50/40/10; 50-60 min: (0.1%)  
 phosphoric acid/acetonitrile/methanol = 30/50/20; 60-80 min: (0.1%) phosphoric  
 acid/acetonitrile/methanol = 0/70/30;  
 detector, UV (280 nm).

**Figure S21.** HPLC analysis of BPA.

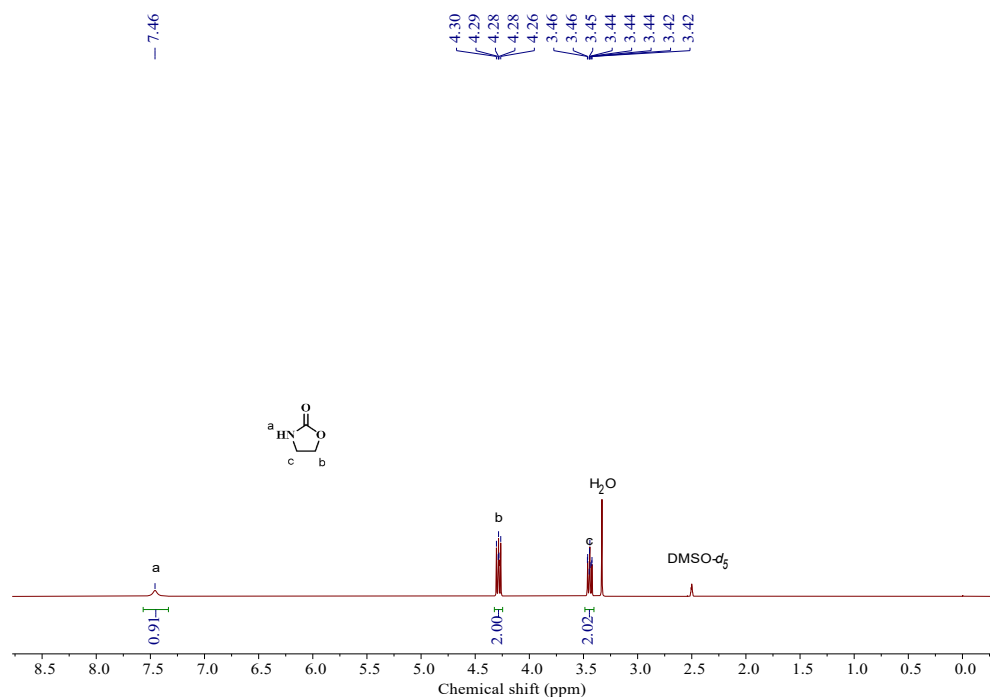

**Figure S22.**  $^1\text{H}$  NMR spectrum of recovered 2-oxazolidone (400 MHz,  $\text{DMSO-}d_6$ , 298 K).

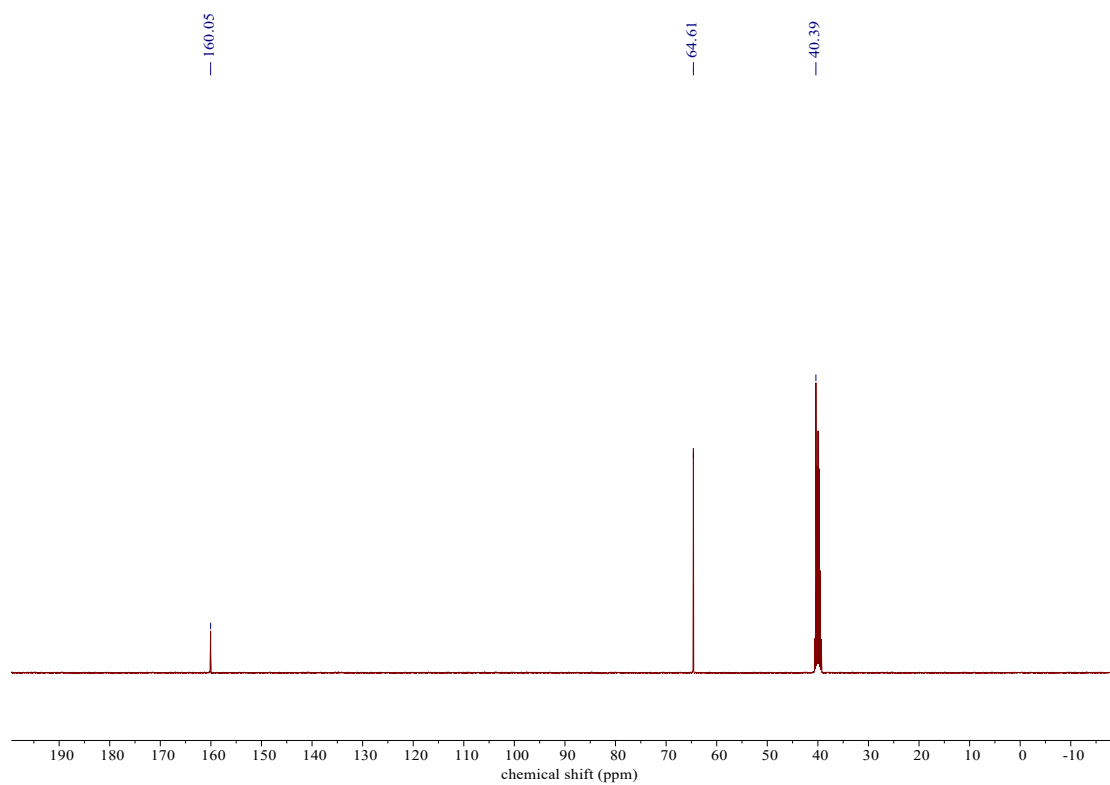

**Figure S23.**  $^{13}\text{C}$  NMR spectrum of recovered 2-oxazolidone (400 MHz,  $\text{DMSO-}d_6$ , 298 K).

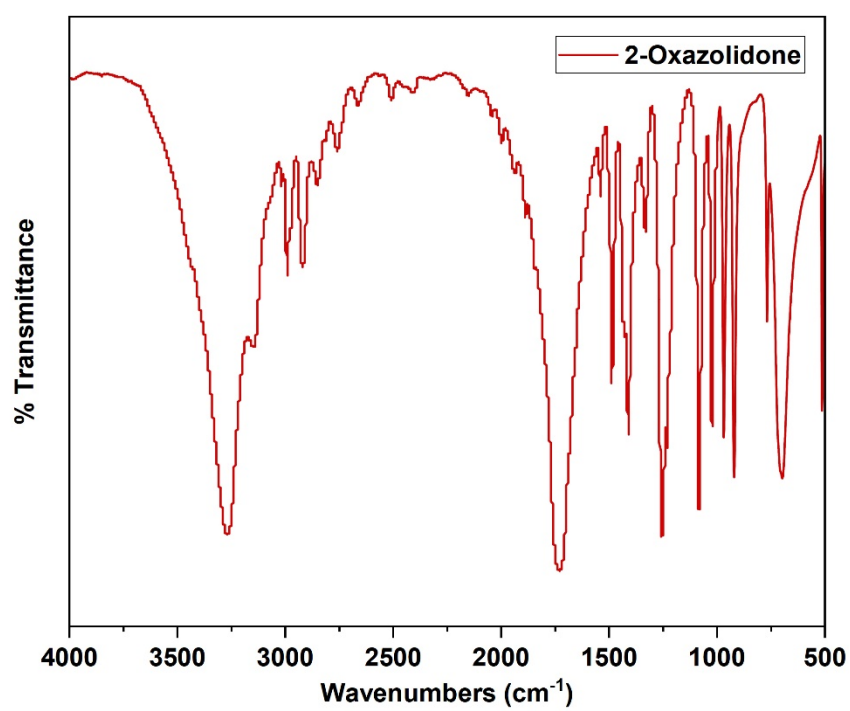

**Figure S24.** IR spectrum of recovered 2-oxazolidone.

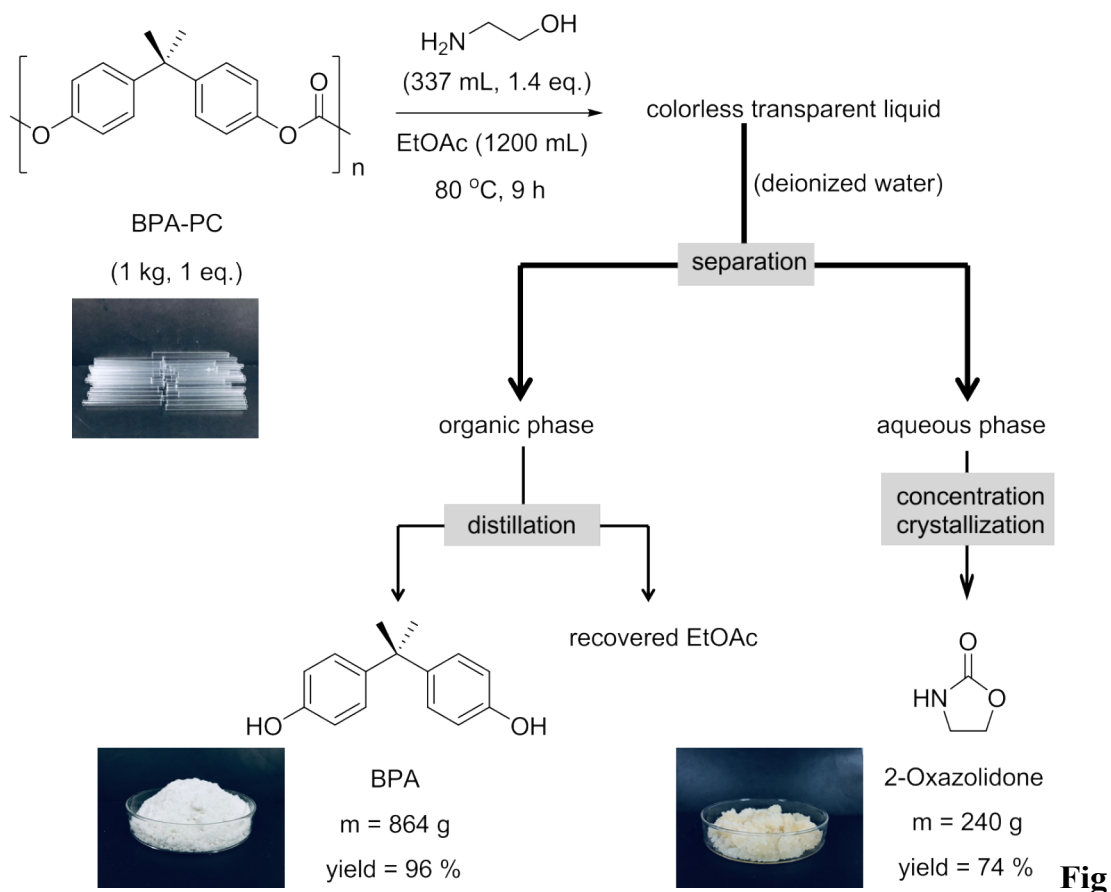

**Figure S25.** The kilogram-scale depolymerization of BPA-PC tube by using ethanolamine. BPA-PC (m = 1 kg, 1 equiv.), ethanolamine (337 mL, 1.4 equiv.), EtOAc (1200 mL).

**Table S5.** The prices of ethanolamine and 2-oxazolidone.

| Chemical                     | Structure                                              | Brand | Grades | Price     |
|------------------------------|--------------------------------------------------------|-------|--------|-----------|
| Ethanolamine                 | $\text{H}_2\text{N}-\text{CH}_2-\text{CH}_2-\text{OH}$ | TCI   | 500 g  | \$ 23.00  |
| 2-Oxazolidone                |                                                        | TCI   | 500 g  | \$ 284.00 |
| D-Phenylalaninol             |                                                        | TCI   | 25 g   | \$ 178.00 |
| (R)-4-Benzyl-2-oxazolidinone |                                                        | TCI   | 25 g   | \$ 322.00 |

**Table S6.** The transmittance of regenerated BPA-PC and original BPA-PC.

| Entry | BPA-PC                           | Transmittance/% |
|-------|----------------------------------|-----------------|
| 1     | Original BPA-PC tube             | 99.10           |
| 2     | Prepared from recovered BPA      | 98.17           |
| 3     | Prepared from commercialized BPA | 98.19           |

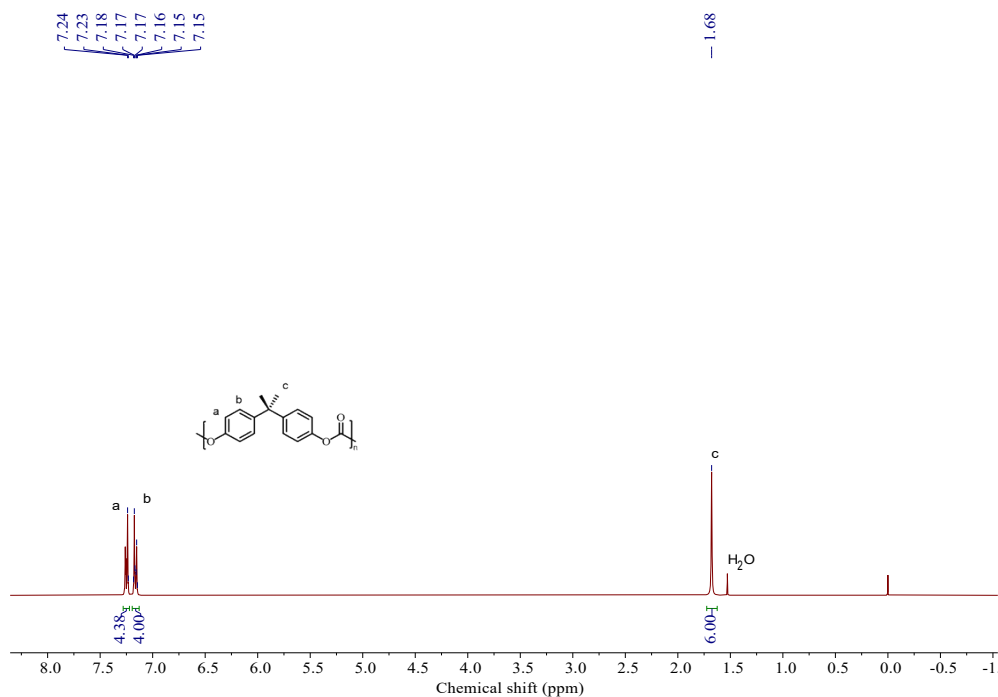

**Figure S26.** <sup>1</sup>H NMR spectrum of BPA-PC synthesized from recycled BPA. (400 MHz, Chloroform-*d*, 298 K).

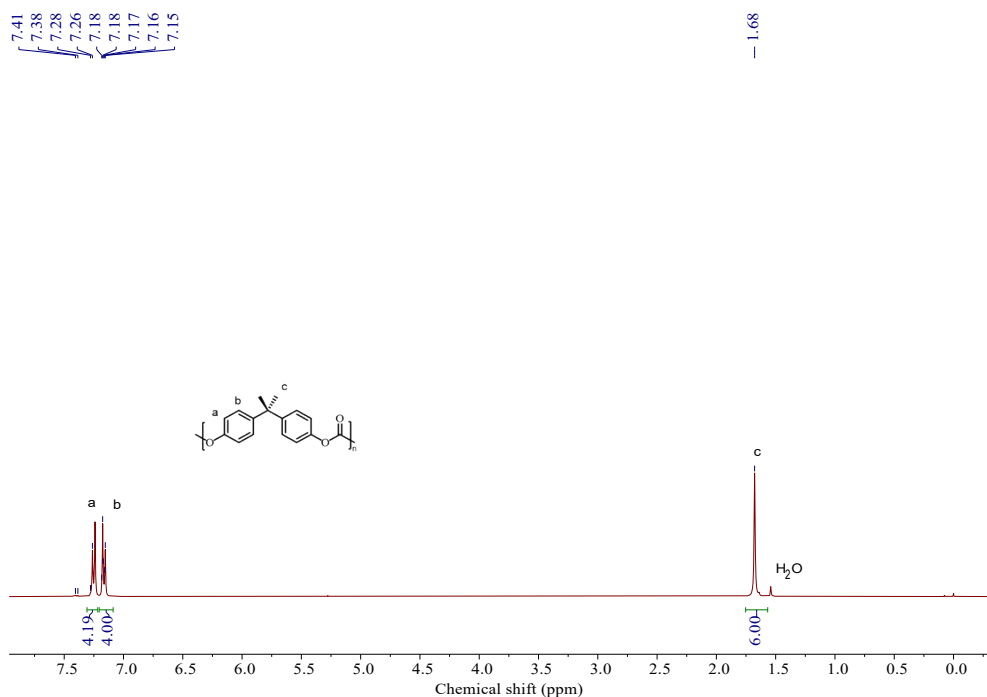

**Figure S27.** <sup>1</sup>H NMR spectrum of BPA-PC synthesized from commercialized BPA.  
(400 MHz, Chloroform-*d*, 298 K).

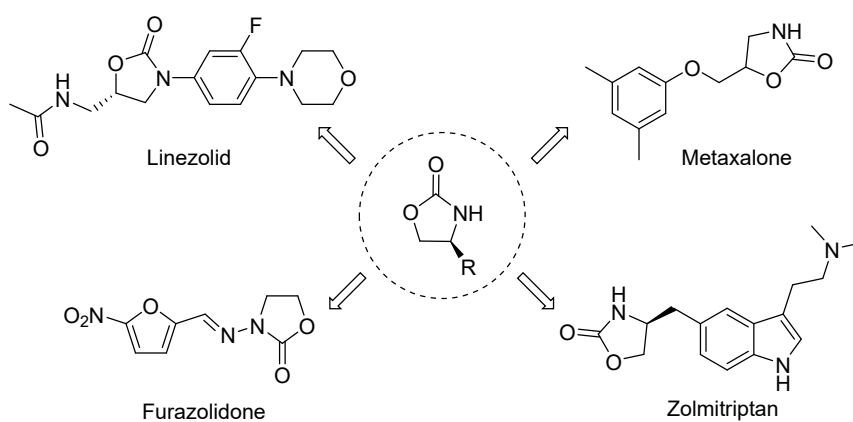

**Figure S28.** Oxazolidinones were important synthetic intermediate in the fields of medicine and pesticides.

### General procedure for the depolymerization of PLA cup

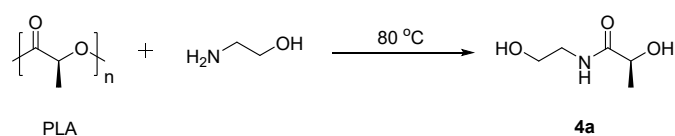

The depolymerization of PLA cup was carried out in a Schlenk flask at 80°C. PLA cup (2 g) was added first. Ethanolamine (5 mL) was then added. The reaction was monitored by <sup>1</sup>H NMR spectrum, aliquot was taken for <sup>1</sup>H NMR spectroscopic analysis. After 1 h, we calculated that the conversion was 100%. The solvent was removed under vacuum. Removed excess ethanolamine by vacuum distillation to obtain oily liquid product **4a** (3.58 g, 97%). <sup>1</sup>H NMR (400 MHz, DMSO-*d*<sub>6</sub>) δ 7.60 (t, *J* = 5.8 Hz, 1H), 5.49 (s, 1H), 4.70 (s, 1H), 3.95 (q, *J* = 6.8 Hz, 1H), 3.40 (t, *J* = 6.0 Hz, 2H), 3.14 (qd, *J* = 6.0, 2.5 Hz, 2H), 1.19 (d, *J* = 6.8 Hz, 3H).<sup>[1]</sup>

### General procedure for the depolymerization of PBS straw

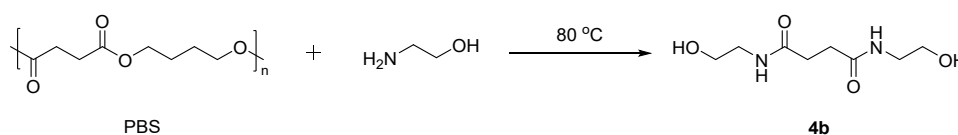

The depolymerization of PBS straw was carried out in a Schlenk flask at 80°C. PBS straw (2 g) was added first. Ethanolamine (5 mL) were then added. The reaction was monitored by <sup>1</sup>H NMR spectrum, aliquot was taken for <sup>1</sup>H NMR spectroscopic analysis. After 5 h, we calculated that the conversion was 100%. Dichloromethane was added to the reaction system, then filtered, the filtered solid was vacuum dried to remove residual dichloromethane to obtain a pure white solid product **4b** (2.32 g, 98%). <sup>1</sup>H NMR (400 MHz, DMSO-*d*<sub>6</sub>) δ 7.79 (t, *J* = 5.6 Hz, 2H), 4.61 (t, *J* = 5.4 Hz, 2H), 3.41 – 3.35 (q, 4H), 3.08 (q, *J* = 6.0 Hz, 4H), 2.29 (s, 4H).

### General procedure for the depolymerization of PET bottle

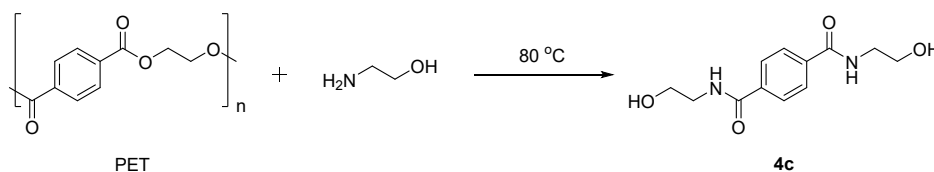

The depolymerization of PET bottle was carried out in a Schlenk flask at 80°C. PET bottle (2 g) was added first. Ethanolamine (5 mL) were then added. The reaction was monitored by <sup>1</sup>H NMR spectrum, aliquot was taken for <sup>1</sup>H NMR spectroscopic analysis. After 24 h, we calculated that the conversion was 100%. Dichloromethane was added to the reaction system, then filtered, the filtered solid was vacuum dried to

remove residual dichloromethane to obtain a pure white solid product **4c** (2.53 g, 96%).  $^1\text{H NMR}$  (400 MHz,  $\text{DMSO-}d_6$ )  $\delta$  8.54 (t,  $J = 5.6$  Hz, 2H), 7.91 (s, 4H), 4.74 (t,  $J = 5.6$  Hz, 2H), 3.52 (q,  $J = 5.9$  Hz, 4H), 3.34 (d,  $J = 6.3$  Hz, 4H).<sup>[2]</sup>

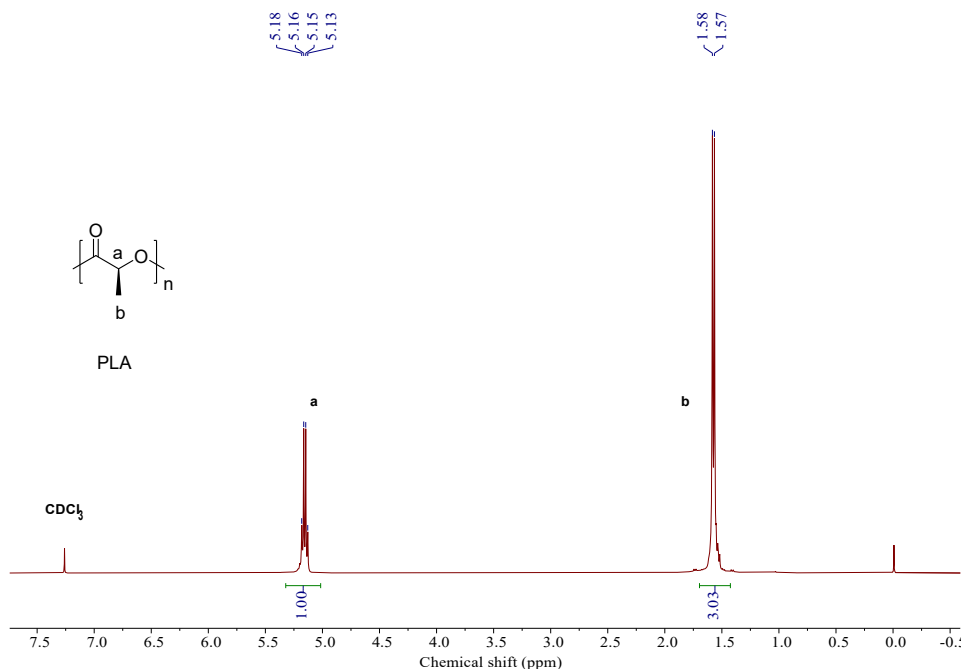

**Figure S29.**  $^1\text{H NMR}$  spectrum of PLA cup. (400 MHz, Chloroform-*d*, 298 K).

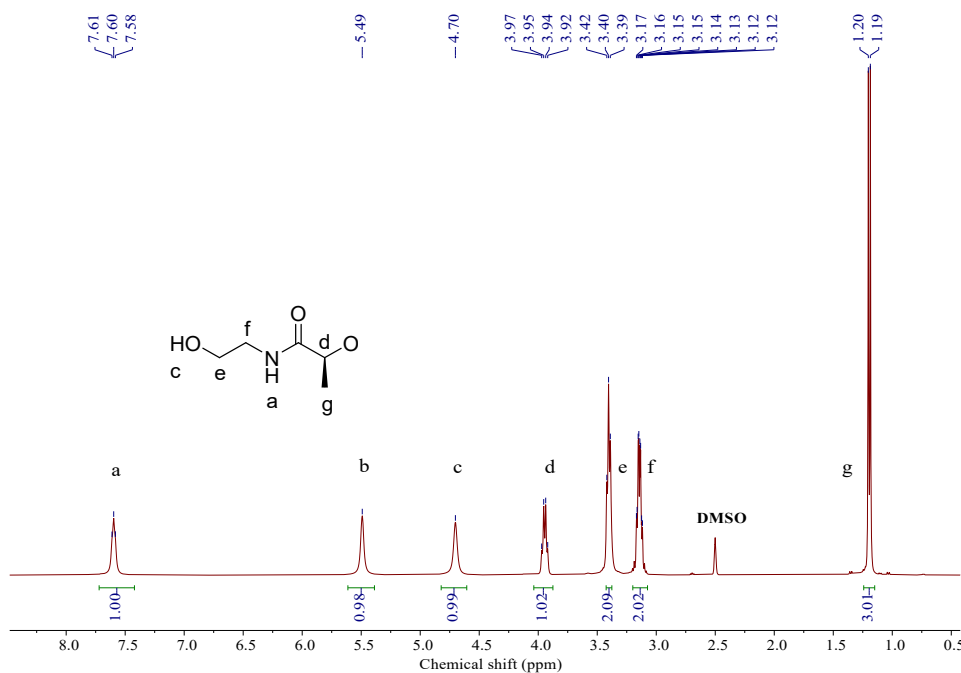

**Figure S30.**  $^1\text{H NMR}$  spectrum of PLA depolymerization product (400 MHz,  $\text{DMSO-}d_6$ ).



$d_6$ , 298 K).

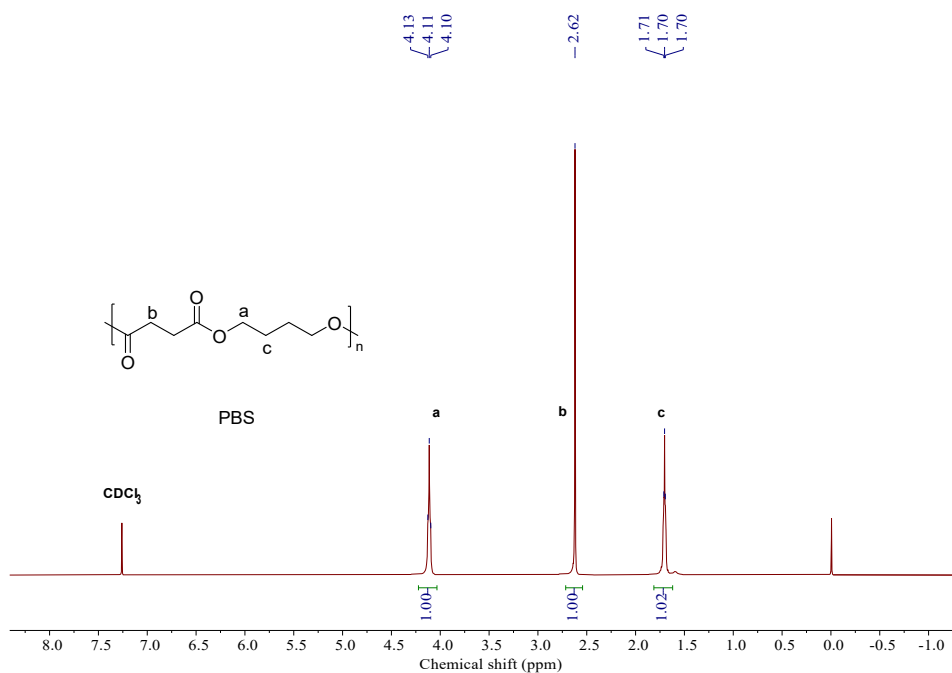

Figure S31.  $^1H$  NMR spectrum of PBS straw. (400 MHz, Chloroform- $d$ , 298 K).

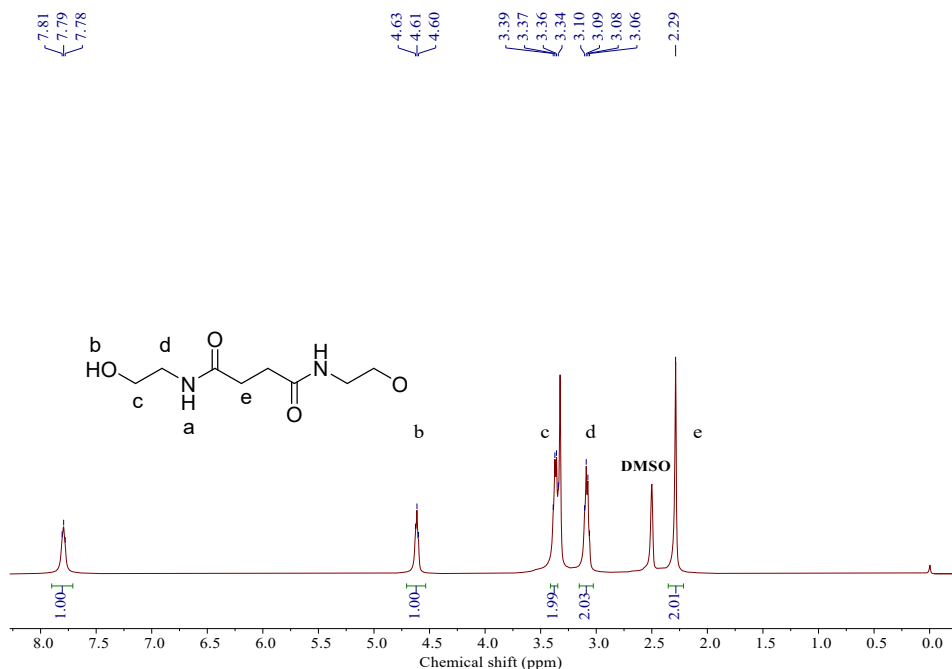

Figure S32.  $^1H$  NMR spectrum of PBS depolymerization product (400 MHz, DMSO- $d_6$ , 298 K).

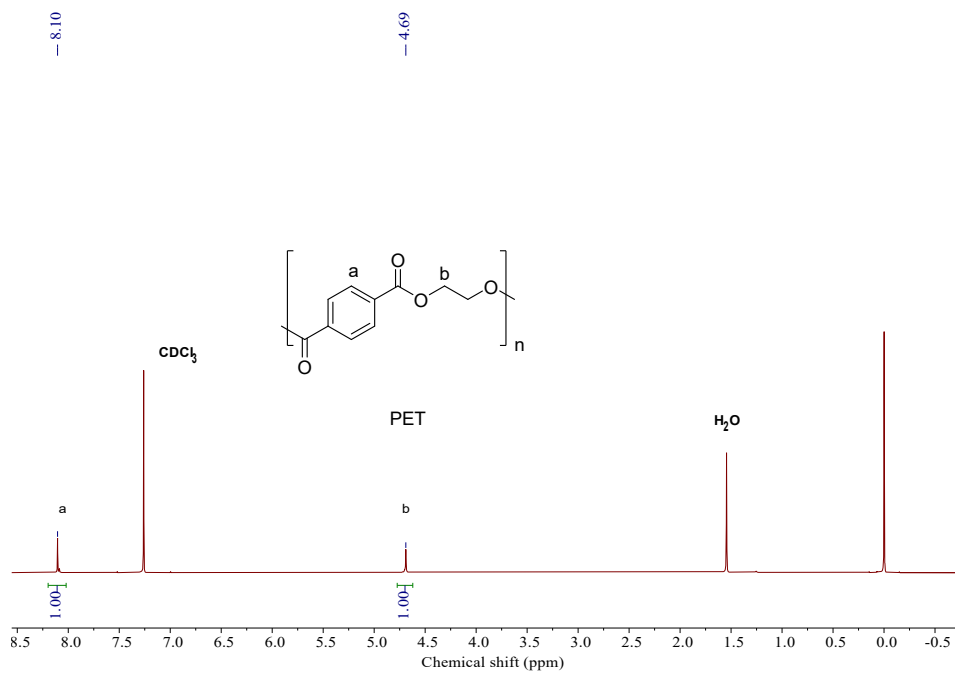

**Figure S33.** <sup>1</sup>H NMR spectrum of PET bottle. (400 MHz, Chloroform-*d*, 298 K).

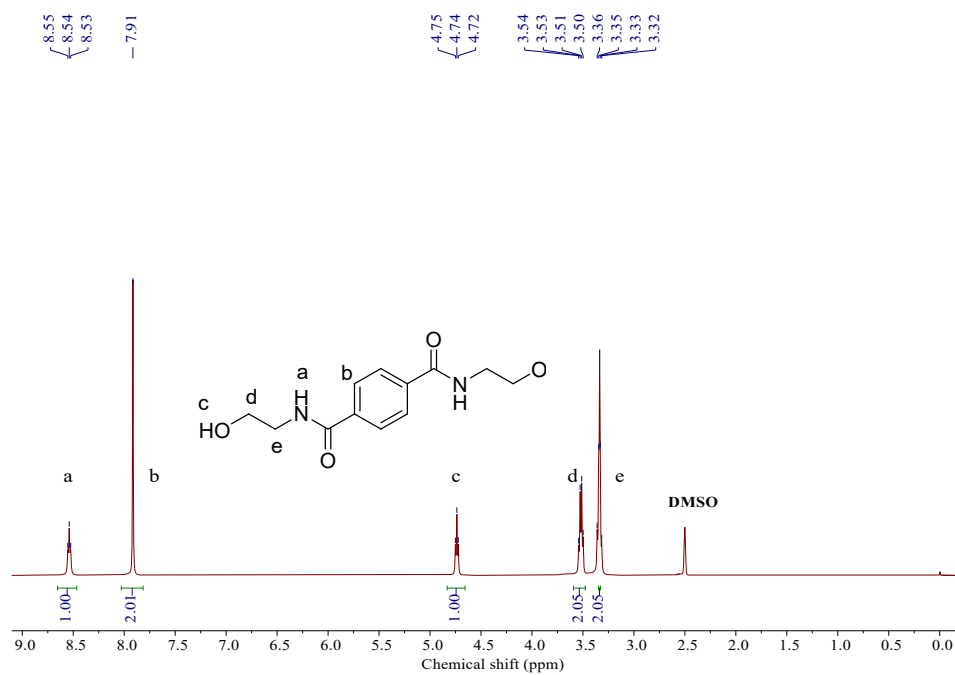

**Figure S34.** <sup>1</sup>H NMR spectrum of PET depolymerization product (400 MHz, DMSO-*d*<sub>6</sub>, 298 K).

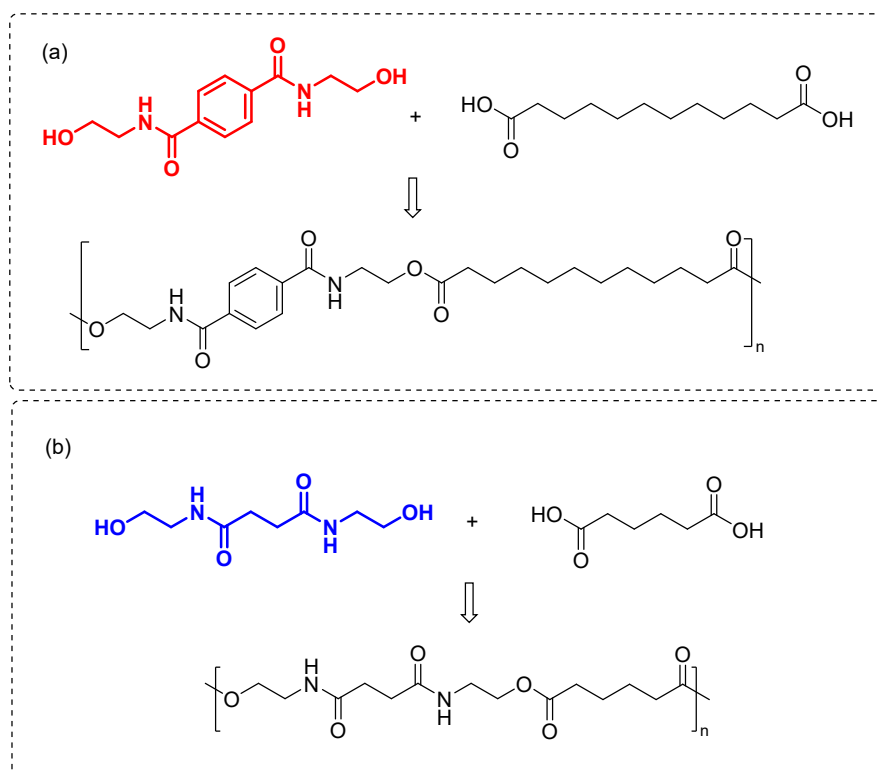

**Figure S35.** The application of aminolysis products.<sup>[3,4]</sup>

## References

- [1] Y. Nishikawa, K. Takemoto, K. Matsuda, R. Tanaka, A. Arashima, K. Ito, Y. Kamezawa, Y. Hori, O. Hara, *Org. Lett.*, 2018, **20**, 3367-3371.
- [2] S. R. Shukla, A. M. Harad, *Polym. Degrad. Stabil.*, 2006, **91**, 1850-1854.
- [3] J. Natarajan, G. Madras and K. Chatterjee, *ACS Appl. Mater. Interfaces*, 2017, **9**, 28281-28297.
- [4] T. H. N. Nguyen, F. Balligand, A. Bormann, V. Bennevault and P. Guégan, *Eur. Polym. J.*, 2019, **121**, 10314.
